# Supplementary material for: Specific Sleep Health Domains as Predictors of Executive Function in Older Adults
Source: Atypon-hosted journal article supplement (doi:10.1176/appi.neuropsych.21040112), 2022-03-11
Supplement: appi.neuropsych.21040112.ds001.pdf [file appi.neuropsych.21040112.ds001.pdf]

Supplemental Material

**SUPPLEMENTAL TABLE S1. Primary Variable Descriptive Statistics**

| Sleep Characteristic              | Mean | SD   |
|-----------------------------------|------|------|
| PSQI <sup>b</sup> Total           | 6.7  | 3.8  |
| PSQI Sleep Latency in minutes     | 20.2 | 23.0 |
| PSQI Sleep Duration in hours      | 6.8  | 1.2  |
| PSQI Sleep Efficiency %           | 84.8 | 14.6 |
| ISI <sup>c</sup> Total            | 6.3  | 4.7  |
| Executive Function Characteristic | Mean | SD   |
| Working Memory                    | 9.9  | 2.9  |
| Concept Formation/Problem Solving | 10.0 | 3.0  |
| Cognitive Flexibility             | 10.0 | 3.0  |
| Response Inhibition               | 9.9  | 2.9  |

*Note.* <sup>a</sup>PSQI = Pittsburgh Sleep Quality Index. <sup>b</sup>ISI = Insomnia Severity Index.

**SUPPLEMENTAL TABLE S2.** Correlations between Insomnia Severity Scores and Executive Function Domains

---

| Executive Function Domain | ISI <sup>a</sup> Total Score |
|---------------------------|------------------------------|
| Working Memory            | .038                         |
| Concept Formation         | .044                         |
| Cognitive Flexibility     | -.021                        |
| Response Inhibition       | -.035                        |

---

*Note.* Pearson's *r* correlations reported. <sup>a</sup>ISI = Insomnia Severity Index.

**SUPPLEMENTAL TABLE S3. Correlations Among Demographic, Psychiatric, Sleep Health, and Executive Function Variables**

| Variable                             | 1       | 2       | 3      | 4      | 5       | 6      | 7       | 8       | 9     | 10    | 11     | 12     | 13     |
|--------------------------------------|---------|---------|--------|--------|---------|--------|---------|---------|-------|-------|--------|--------|--------|
| 1. Age                               | -       |         |        |        |         |        |         |         |       |       |        |        |        |
| 2. Years of education                | .148    | -       |        |        |         |        |         |         |       |       |        |        |        |
| 3. Sex                               | -.154   | -.122   | -      |        |         |        |         |         |       |       |        |        |        |
| 4. MoCA <sup>a</sup>                 | -.222*  | .147    | .254** | -      |         |        |         |         |       |       |        |        |        |
| 5. Anxiety                           | -.356** | -.254** | .145   | -.006  | -       |        |         |         |       |       |        |        |        |
| 6. Depression                        | -.110   | -.119   | .074   | -.074  | .533**  | -      |         |         |       |       |        |        |        |
| 7. Satisfaction/quality <sup>b</sup> | -.102   | -.260** | -.035  | .045   | -.591** | .310** | -       |         |       |       |        |        |        |
| 8. Sleep efficiency                  | -.042   | .288**  | -.199* | .112   | -.269** | -.114  | .445**  | -       |       |       |        |        |        |
| 9. Sleep duration                    | -.008   | .277**  | -.005  | -.036  | -.158   | -.045  | .569**  | .513**  | -     |       |        |        |        |
| 10. Sleepiness/fatigue               | -.109   | -.233*  | -.044  | -.006  | .509**  | .339** | -.507** | -.256** | -.170 | -     |        |        |        |
| 11. Working memory                   | -.089   | .205*   | .034   | .197*  | -.007   | -.117  | .049    | .127    | .084  | -.001 | -      |        |        |
| 12. Concept formation                | -.379** | .196*   | .246** | .375** | .094    | .049   | -.042   | .165    | .164  | .131  | .267** | -      |        |
| 13. Cognitive flexibility            | -.445** | .192*   | -.002  | .381** | .013    | -.122  | .015    | .154    | -.029 | -.142 | .365** | .380** | -      |
| 14. Response inhibition              | -.164   | .177    | .067   | .279** | -.048   | -.148  | .029    | .243**  | .021  | .004  | .272** | .173   | .386** |

*Note.* Pearson's *r* correlations reported between each variable. \* $p < .05$ ; \*\* $p < .001$ .

<sup>a</sup>MoCA= Montreal Cognitive Assessment. <sup>b</sup>Satisfaction/quality = Sleep Satisfaction and Quality.
